# Supplementary material for: Different extraction methodologies and their influence on the bioactivity of the wild edible mushroom Laetiporus sulphureus (Bull.) Murrill
Source: Royal Society of Chemistry journal article supplement (doi:10.1039/c4fo00727a), 2014-08-26
Supplement: c4fo00727a1.pdf [file c4fo00727a1.pdf]

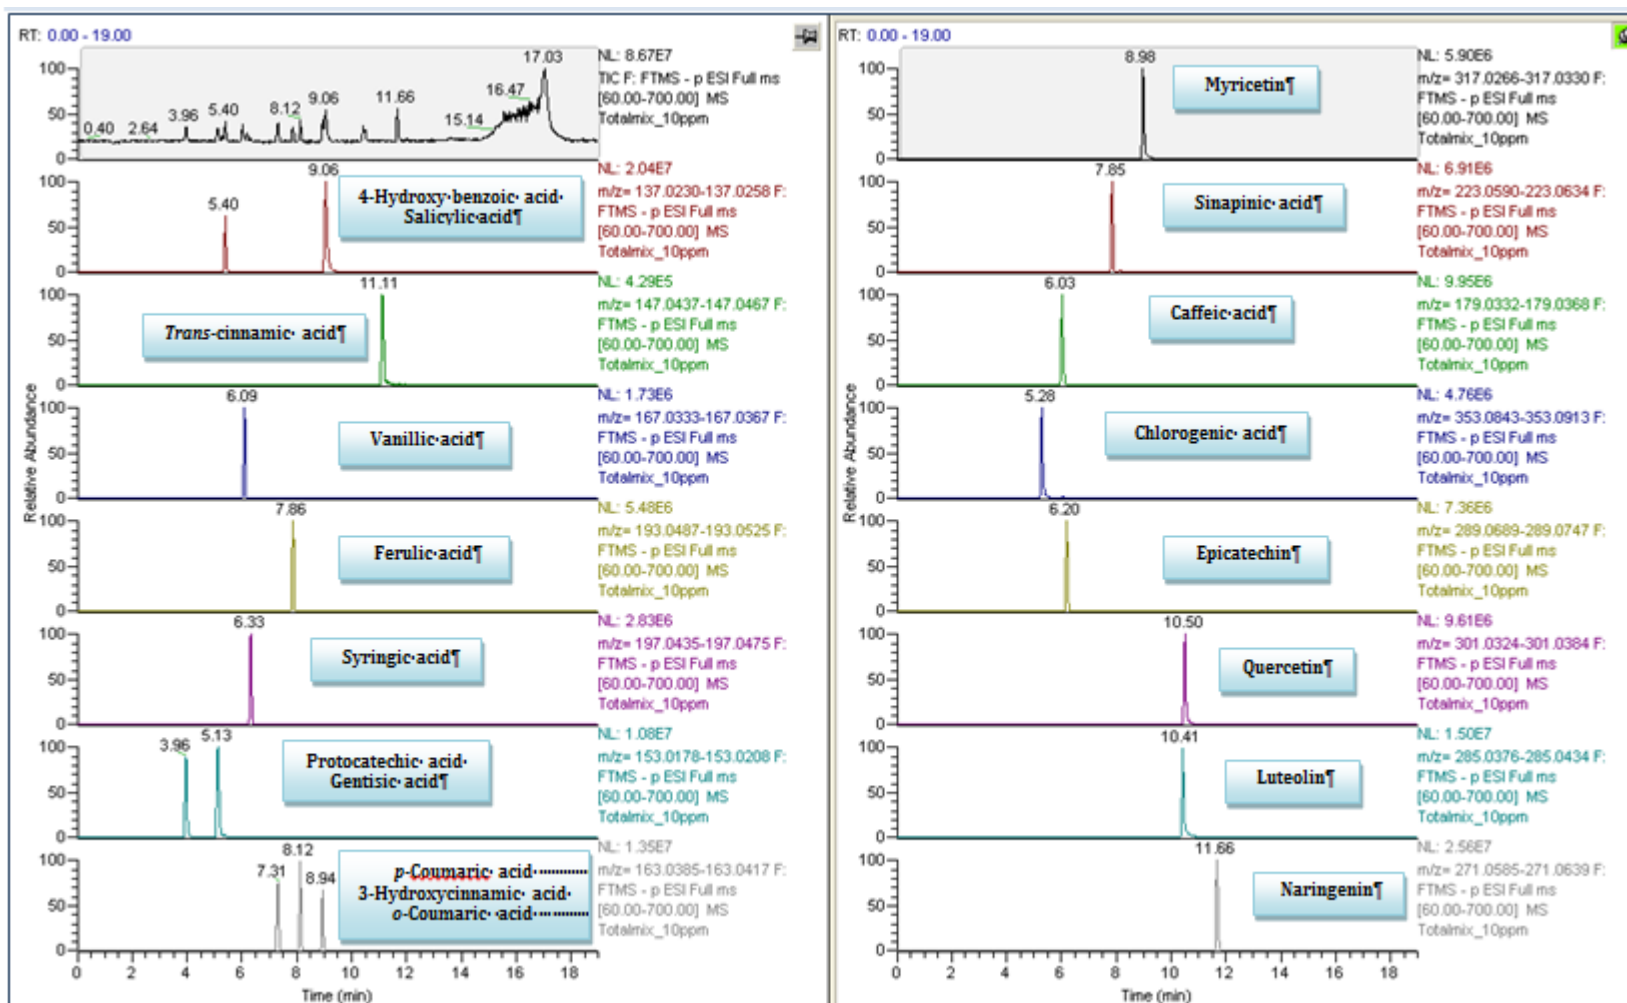

Figure S1. Total Ion Current and separated chromatograms of the standard mixture solution (10ppm) with the 19 standard phenolic compounds

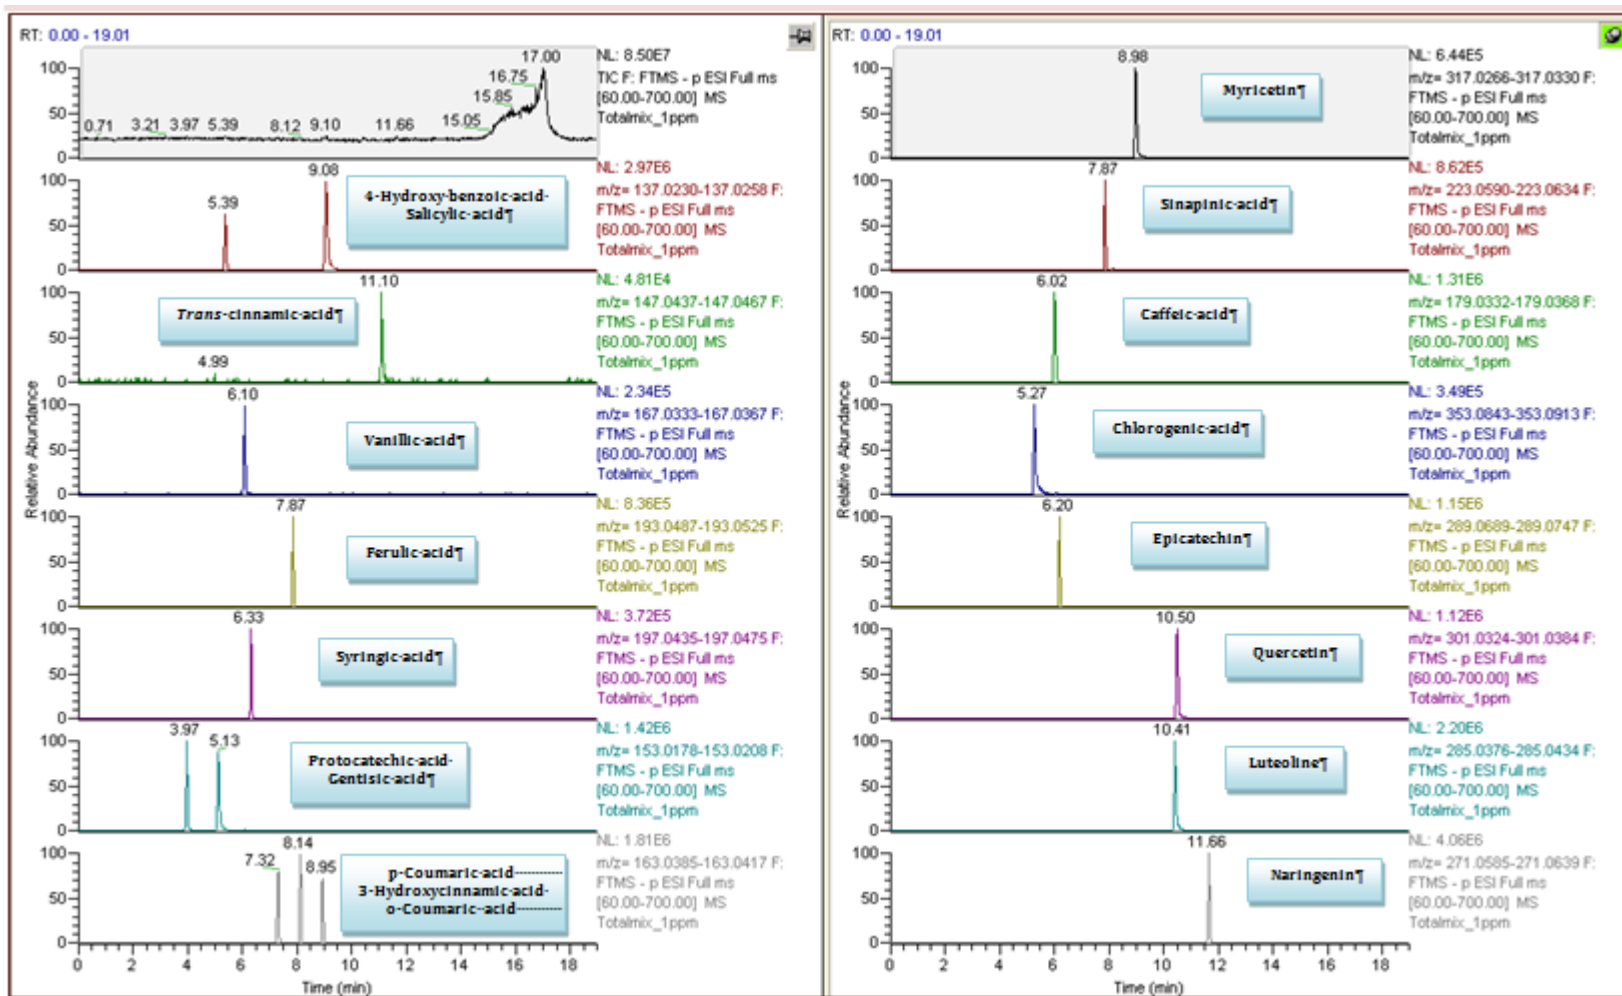

Figure S2. Total Ion Current and separated chromatograms of the standard mixture solution (1ppm) with the 19 standard phenolic compounds
